# Supplementary material for: Nepheliosyne B, a New Polyacetylenic Acid from the New Caledonian Marine Sponge Niphates sp
Source: MDPI journal article supplement (doi:10.3390/md11072282), 2013-06-27
Supplement: s2 [file s2]

marinedrugs-11-02282-s001.mol
  corina  04141405213D 1   1.00000     0.00000 
CORINA 3.49 0023  12.04.2013
 59 58  0  0  0  0  0  0  0  0999 V2000
    1.1560    0.5772   -1.1235 C   0  0  0  0  0  0  0  0  0  0  0  0
    0.9551   -0.9357   -1.0164 C   0  0  0  0  0  0  0  0  0  0  0  0
    1.6256   -1.4503    0.2589 C   0  0  0  0  0  0  0  0  0  0  0  0
    1.3195   -2.9395    0.4309 C   0  0  0  0  0  0  0  0  0  0  0  0
    1.8839   -3.4251    1.7675 C   0  0  0  0  0  0  0  0  0  0  0  0
    1.5778   -4.9143    1.9394 C   0  0  0  0  0  0  0  0  0  0  0  0
    2.1422   -5.4000    3.2760 C   0  0  0  0  0  0  0  0  0  0  0  0
    1.8361   -6.8891    3.4480 C   0  0  0  0  0  0  0  0  0  0  0  0
    2.4005   -7.3748    4.7846 C   0  0  0  0  0  0  0  0  0  0  0  0
    2.0944   -8.8640    4.9565 C   0  0  0  0  0  0  0  0  0  0  0  0
    2.6588   -9.3496    6.2931 C   0  0  0  0  0  0  0  0  0  0  0  0
    2.3527  -10.8388    6.4651 C   0  0  0  0  0  0  0  0  0  0  0  0
    2.9172  -11.3245    7.8016 C   0  0  0  0  0  0  0  0  0  0  0  0
    2.6110  -12.8136    7.9736 C   0  0  0  0  0  0  0  0  0  0  0  0
    3.1755  -13.2993    9.3102 C   0  0  0  0  0  0  0  0  0  0  0  0
    2.8693  -14.7885    9.4821 C   0  0  0  0  0  0  0  0  0  0  0  0
    2.5468    0.8627   -1.2860 O   0  0  0  0  0  0  0  0  0  0  0  0
   -0.1112   -1.1591   -0.9818 H   0  0  0  0  0  0  0  0  0  0  0  0
    3.0390   -1.2625    0.1631 O   0  0  0  0  0  0  0  0  0  0  0  0
    3.4338  -15.2741   10.8187 C   0  0  0  0  0  0  0  0  0  0  0  0
    3.1323  -16.7409   10.9881 C   0  0  0  0  0  0  0  0  0  0  0  0
    3.5845  -17.4646   12.2302 C   0  0  0  0  0  0  0  0  0  0  0  0
    2.6114  -17.1716   13.3739 C   0  0  0  0  0  0  0  0  0  0  0  0
    2.5283  -17.3364   10.1285 O   0  0  0  0  0  0  0  0  0  0  0  0
    3.6137  -18.8709   11.9781 O   0  0  0  0  0  0  0  0  0  0  0  0
    3.1365  -17.8034   14.6647 C   0  0  0  0  0  0  0  0  0  0  0  0
    2.1634  -17.5104   15.8085 C   0  0  0  0  0  0  0  0  0  0  0  0
    2.6806  -18.1327   17.0798 C   0  0  0  0  0  0  0  0  0  0  0  0
    2.8024  -17.4054   18.1626 C   0  0  0  0  0  0  0  0  0  0  0  0
    2.2691  -15.9962   18.1877 C   0  0  0  0  0  0  0  0  0  0  0  0
    1.3303  -15.8274   19.3840 C   0  0  0  0  0  0  0  0  0  0  0  0
    0.7889  -14.3966   19.4095 C   0  0  0  0  0  0  0  0  0  0  0  0
   -0.1499  -14.2278   20.6057 C   0  0  0  0  0  0  0  0  0  0  0  0
   -4.3934  -10.0323   23.7060 C   0  0  0  0  0  0  0  0  0  0  0  0
   -5.0312   -8.6423   23.6616 C   0  0  0  0  0  0  0  0  0  0  0  0
   -5.8595   -8.4298   24.9025 C   0  0  0  0  0  0  0  0  0  0  0  0
   -5.6393   -7.3888   25.6666 C   0  0  0  0  0  0  0  0  0  0  0  0
   -6.4676   -7.1762   26.9075 C   0  0  0  0  0  0  0  0  0  0  0  0
   -5.5442   -7.0387   28.1197 C   0  0  0  0  0  0  0  0  0  0  0  0
   -6.3632   -6.7044   29.3397 C   0  0  0  0  0  0  0  0  0  0  0  0
   -6.2791   -7.4541   30.4107 C   0  0  0  0  0  0  0  0  0  0  0  0
   -7.0981   -7.1198   31.6307 C   0  0  0  0  0  0  0  0  0  0  0  0
   -7.9650   -6.0225   31.3365 O   0  0  0  0  0  0  0  0  0  0  0  0
   -4.8521   -8.2705   28.3335 O   0  0  0  0  0  0  0  0  0  0  0  0
   -5.4170  -11.0280   23.6524 O   0  0  0  0  0  0  0  0  0  0  0  0
    0.5925  -14.3727   21.8181 O   0  0  0  0  0  0  0  0  0  0  0  0
    0.4109    1.0902   -2.2847 C   0  0  0  0  0  0  0  0  0  0  0  0
   -0.1834    1.4993   -3.2108 C   0  0  0  0  0  0  0  0  0  0  0  0
   -3.4902  -10.1947   22.5551 C   0  0  0  0  0  0  0  0  0  0  0  0
   -0.7636  -12.8905   20.5630 C   0  0  0  0  0  0  0  0  0  0  0  0
   -1.2530  -11.8239   20.5290 C   0  0  0  0  0  0  0  0  0  0  0  0
   -2.7698  -10.3242   21.6372 C   0  0  0  0  0  0  0  0  0  0  0  0
   -1.8666  -10.4866   20.4863 C   0  0  0  0  0  0  0  0  0  0  0  0
   -0.8430   -9.4909   20.5399 O   0  0  0  0  0  0  0  0  0  0  0  0
   -7.9023   -8.2904   32.0178 C   0  0  0  0  0  0  0  0  0  0  0  0
   -8.5437   -9.2240   32.3264 C   0  0  0  0  0  0  0  0  0  0  0  0
   -0.9083    1.9984   -4.3405 C   0  0  0  0  0  0  0  0  0  0  0  0
   -0.8809    3.1844   -4.6044 O   0  0  0  0  0  0  0  0  0  0  0  0
   -1.6210    1.1527   -5.1111 O   0  0  0  0  0  0  0  0  0  0  0  0
  1  2  1  0      
  2  3  1  0      
  3  4  1  0      
  4  5  1  0      
  5  6  1  0      
  6  7  1  0      
  7  8  1  0      
  8  9  1  0      
  9 10  1  0      
 10 11  1  0      
 11 12  1  0      
 12 13  1  0      
 13 14  1  0      
 14 15  1  0      
 15 16  1  0      
  1 17  1  0      
  2 18  1  0      
  3 19  1  0      
 16 20  1  0      
 20 21  1  0      
 21 22  1  0      
 22 23  1  0      
 21 24  2  0      
 22 25  1  0      
 23 26  1  0      
 26 27  1  0      
 27 28  1  0      
 28 29  2  0      
 29 30  1  0      
 30 31  1  0      
 31 32  1  0      
 32 33  1  0      
 34 35  1  0      
 35 36  1  0      
 36 37  2  0      
 37 38  1  0      
 38 39  1  0      
 39 40  1  0      
 40 41  2  0      
 41 42  1  0      
 42 43  1  0      
 39 44  1  0      
 34 45  1  0      
 33 46  1  0      
  1 47  1  0      
 47 48  3  0      
 34 49  1  0      
 33 50  1  0      
 50 51  3  0      
 49 52  3  0      
 51 53  1  0      
 52 53  1  0      
 53 54  1  0      
 42 55  1  0      
 55 56  3  0      
 48 57  1  0      
 57 58  2  0      
 57 59  1  0      
M  STY  1   1 SUP
M  SLB  1   1   1
M  SAL   1  3  57  58  59
M  SBL   1  1  56
M  SMT   1 CO2H
M  SBV   1 56  -17.4183    4.5870
M  END
$$$$
