# Supplementary material for: Nepheliosyne B, a New Polyacetylenic Acid from the New Caledonian Marine Sponge Niphates sp
Source: MDPI journal article supplement (doi:10.3390/md11072282), 2013-06-27
Supplement: s3 [file s3]

marinedrugs-11-02282-s001.mol
  ChemDraw04141417192D

 59 58  0  0  0  0  0  0  0  0999 V2000
  -13.1826    0.8154    0.0000 C   0  0  0  0  0  0  0  0  0  0  0  0
  -12.4681    0.4029    0.0000 C   0  0  0  0  0  0  0  0  0  0  0  0
  -11.7537    0.8154    0.0000 C   0  0  0  0  0  0  0  0  0  0  0  0
  -11.0393    0.4029    0.0000 C   0  0  0  0  0  0  0  0  0  0  0  0
  -10.3248    0.8154    0.0000 C   0  0  0  0  0  0  0  0  0  0  0  0
   -9.6103    0.4029    0.0000 C   0  0  0  0  0  0  0  0  0  0  0  0
   -8.8959    0.8154    0.0000 C   0  0  0  0  0  0  0  0  0  0  0  0
   -8.1814    0.4029    0.0000 C   0  0  0  0  0  0  0  0  0  0  0  0
   -7.4670    0.8154    0.0000 C   0  0  0  0  0  0  0  0  0  0  0  0
   -6.7526    0.4029    0.0000 C   0  0  0  0  0  0  0  0  0  0  0  0
   -6.0381    0.8154    0.0000 C   0  0  0  0  0  0  0  0  0  0  0  0
   -5.3236    0.4029    0.0000 C   0  0  0  0  0  0  0  0  0  0  0  0
   -4.6092    0.8154    0.0000 C   0  0  0  0  0  0  0  0  0  0  0  0
   -3.8948    0.4029    0.0000 C   0  0  0  0  0  0  0  0  0  0  0  0
   -3.1803    0.8154    0.0000 C   0  0  0  0  0  0  0  0  0  0  0  0
   -2.4658    0.4029    0.0000 C   0  0  0  0  0  0  0  0  0  0  0  0
  -13.1826    1.6403    0.0000 O   0  0  0  0  0  0  0  0  0  0  0  0
  -12.4681   -0.4221    0.0000 H   0  0  0  0  0  0  0  0  0  0  0  0
  -11.7537    1.6403    0.0000 O   0  0  0  0  0  0  0  0  0  0  0  0
   -1.7514    0.8154    0.0000 C   0  0  0  0  0  0  0  0  0  0  0  0
   -1.0370    0.4029    0.0000 C   0  0  0  0  0  0  0  0  0  0  0  0
   -0.3225    0.8154    0.0000 C   0  0  0  0  0  0  0  0  0  0  0  0
    0.3920    0.4029    0.0000 C   0  0  0  0  0  0  0  0  0  0  0  0
   -1.0370   -0.4221    0.0000 O   0  0  0  0  0  0  0  0  0  0  0  0
   -0.3225    1.6403    0.0000 O   0  0  0  0  0  0  0  0  0  0  0  0
    1.1064    0.8154    0.0000 C   0  0  0  0  0  0  0  0  0  0  0  0
    1.8209    0.4029    0.0000 C   0  0  0  0  0  0  0  0  0  0  0  0
    2.5353    0.8154    0.0000 C   0  0  0  0  0  0  0  0  0  0  0  0
    3.3603    0.8154    0.0000 C   0  0  0  0  0  0  0  0  0  0  0  0
    4.0747    0.4029    0.0000 C   0  0  0  0  0  0  0  0  0  0  0  0
    4.7892    0.8154    0.0000 C   0  0  0  0  0  0  0  0  0  0  0  0
    5.5036    0.4029    0.0000 C   0  0  0  0  0  0  0  0  0  0  0  0
    6.2181    0.8154    0.0000 C   0  0  0  0  0  0  0  0  0  0  0  0
    8.7548    0.9075    0.0000 C   0  0  0  0  0  0  0  0  0  0  0  0
    9.6608    0.3823    0.0000 C   0  0  0  0  0  0  0  0  0  0  0  0
   10.3753    0.7947    0.0000 C   0  0  0  0  0  0  0  0  0  0  0  0
   11.0897    0.3823    0.0000 C   0  0  0  0  0  0  0  0  0  0  0  0
   11.8042    0.7947    0.0000 C   0  0  0  0  0  0  0  0  0  0  0  0
   12.5186    0.3823    0.0000 C   0  0  0  0  0  0  0  0  0  0  0  0
   13.2330    0.7947    0.0000 C   0  0  0  0  0  0  0  0  0  0  0  0
   13.9475    0.3823    0.0000 C   0  0  0  0  0  0  0  0  0  0  0  0
   14.6620    0.7947    0.0000 C   0  0  0  0  0  0  0  0  0  0  0  0
   14.6620    1.6197    0.0000 O   0  0  0  0  0  0  0  0  0  0  0  0
   12.5186   -0.4427    0.0000 O   0  0  0  0  0  0  0  0  0  0  0  0
    8.7548    1.7325    0.0000 O   0  0  0  0  0  0  0  0  0  0  0  0
    6.2181    1.6403    0.0000 O   0  0  0  0  0  0  0  0  0  0  0  0
  -13.8296    0.3094    0.0000 C   0  0  0  0  0  0  0  0  0  0  0  0
  -14.9640    0.3094    0.0000 C   0  0  0  0  0  0  0  0  0  0  0  0
    7.8473    0.3094    0.0000 C   0  0  0  0  0  0  0  0  0  0  0  0
    6.6304    0.3713    0.0000 C   0  0  0  0  0  0  0  0  0  0  0  0
    6.6304   -0.3300    0.0000 C   0  0  0  0  0  0  0  0  0  0  0  0
    7.8473   -0.3300    0.0000 C   0  0  0  0  0  0  0  0  0  0  0  0
    7.1667   -0.9075    0.0000 C   0  0  0  0  0  0  0  0  0  0  0  0
    7.1667   -1.7325    0.0000 O   0  0  0  0  0  0  0  0  0  0  0  0
   15.3765    0.3823    0.0000 C   0  0  0  0  0  0  0  0  0  0  0  0
   16.2015    0.3823    0.0000 C   0  0  0  0  0  0  0  0  0  0  0  0
  -15.3765   -0.4042    0.0000 C   0  0  0  0  0  0  0  0  0  0  0  0
  -14.9640   -1.1187    0.0000 O   0  0  0  0  0  0  0  0  0  0  0  0
  -16.2015   -0.4042    0.0000 O   0  0  0  0  0  0  0  0  0  0  0  0
  1  2  1  0      
  2  3  1  0      
  3  4  1  0      
  4  5  1  0      
  5  6  1  0      
  6  7  1  0      
  7  8  1  0      
  8  9  1  0      
  9 10  1  0      
 10 11  1  0      
 11 12  1  0      
 12 13  1  0      
 13 14  1  0      
 14 15  1  0      
 15 16  1  0      
  1 17  1  0      
  2 18  1  0      
  3 19  1  0      
 16 20  1  0      
 20 21  1  0      
 21 22  1  0      
 22 23  1  0      
 21 24  2  0      
 22 25  1  0      
 23 26  1  0      
 26 27  1  0      
 27 28  1  0      
 28 29  2  0      
 29 30  1  0      
 30 31  1  0      
 31 32  1  0      
 32 33  1  0      
 34 35  1  0      
 35 36  1  0      
 36 37  2  0      
 37 38  1  0      
 38 39  1  0      
 39 40  1  0      
 40 41  2  0      
 41 42  1  0      
 42 43  1  0      
 39 44  1  0      
 34 45  1  0      
 33 46  1  0      
  1 47  1  0      
 47 48  3  0      
 34 49  1  0      
 33 50  1  0      
 50 51  3  0      
 49 52  3  0      
 51 53  1  0      
 52 53  1  0      
 53 54  1  0      
 42 55  1  0      
 55 56  3  0      
 48 57  1  0      
 57 58  2  0      
 57 59  1  0      
M  STY  1   1 SUP
M  SLB  1   1   1
M  SAL   1  3  57  58  59
M  SBL   1  1  56
M  SMT   1 CO2H
M  SBV   1 56  -17.4183    4.5870
M  END
